# Supplementary material for: Ratiometric RNA aptamer/fluorophore complex for RNA synthesis detection
Source: Royal Society of Chemistry journal article supplement (doi:10.1039/c8ay01880d), 2018-01-01
Supplement: c8ay01880d1.pdf [file c8ay01880d1.pdf]

# Ratiometric RNA aptamer/fluorophore complex for RNA synthesis detection

*Hui Guo,<sup>‡‡</sup> Mengyue Fan,<sup>‡‡</sup> Zengjin Li,<sup>†</sup> Wei Tang,<sup>†\*</sup> Xinrui Duan<sup>†\*</sup>*

<sup>†</sup>Key laboratory of analytical chemistry for life science of Shaanxi Province, School of Chemistry and Chemical Engineering, Shaanxi Normal University, Xi'an, Shaanxi, 710119,

P. R. China

<sup>‡</sup>These authors contribute equally to this work.

E-Mail: tangwei@snnu.edu.cn; duanxr@snnu.edu.cn

**Table of content:**

|                    |           |
|--------------------|-----------|
| <b>Figure S1-2</b> | <b>S1</b> |
| <b>Table S1</b>    | <b>S1</b> |
| <b>Figure S3-4</b> | <b>S2</b> |
| <b>Figure S5</b>   | <b>S3</b> |

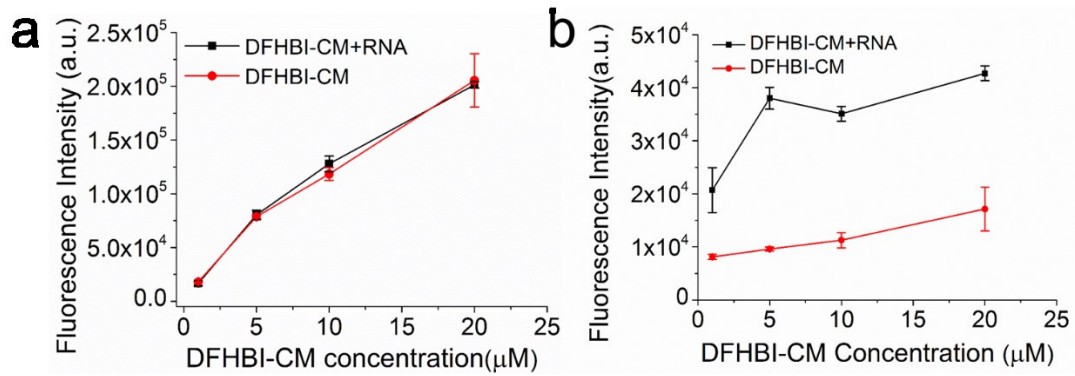

**Figure S1.** Effect of DFHBI-CM concentration on fluorescence under the excitation of 337 nm (a) and 447 nm (b). The emission wavelength is 420 nm and 502 nm, respectively. Purified RNA concentration is 500 nM. The spectra were measured in HEPES buffer [40 mM HEPES (pH 7.5), 19 mM  $\text{MgCl}_2$ , 100 mM KCl] at room temperature.

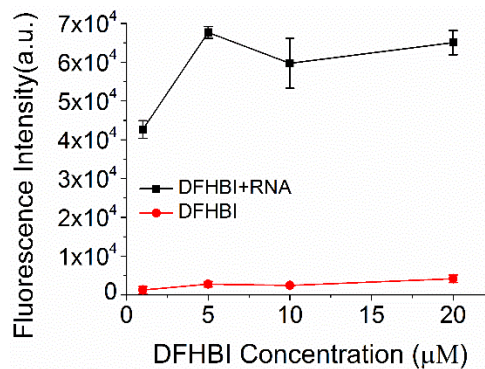

**Figure S2.** Effect of DFHBI concentration on fluorescence under the excitation of 447 nm. The emission wavelength is 502 nm. Purified RNA concentration is 500 nM. The spectra were measured in HEPES buffer [40 mM HEPES (pH 7.5), 19 mM  $\text{MgCl}_2$ , 100 mM KCl] at room temperature.

**Table S1** DNA sequence of transcription template

| Name            | Sequences (5'-3')                                                                                                                                                                                                                                                                                                                                                                                                               |
|-----------------|---------------------------------------------------------------------------------------------------------------------------------------------------------------------------------------------------------------------------------------------------------------------------------------------------------------------------------------------------------------------------------------------------------------------------------|
| T7-HHR-Spanich2 | <p><u>TAATACGACTCACTATA</u><u>GGGAGACAGCCTACGAGCCTGAGCCTCCA</u><br/> <u>GTCACCGGATGTGCTTTCGGTCTGATGAGTCCGTGAGGACGAAA</u><br/> <u>CTGGTGCAGTCTTAAGCGTAGAGG</u><u>GCCCGGATAGCTCAGTCGGTA</u><br/> <u>GAGCAGCGCCGGATGTA</u><u>ACTGAATGAAATGGTGAAGGACGGGT</u><br/> <u>CCAGTAGGCTGCTTCGGCAGCCTACTTGTTGAGTAGAGTGTGAGC</u><br/> <u>TCCGTA</u><u>ACTAGTTACATCCGGCCGCGGGTCCAGGGTTC</u><u>AAGTCCC</u><br/> <u>TGTT</u><u>CGGGCGCCA</u></p> |

Red: T7 promotor; Blue: 32mer ROI; Black: HHR; Greed: Spanich2.

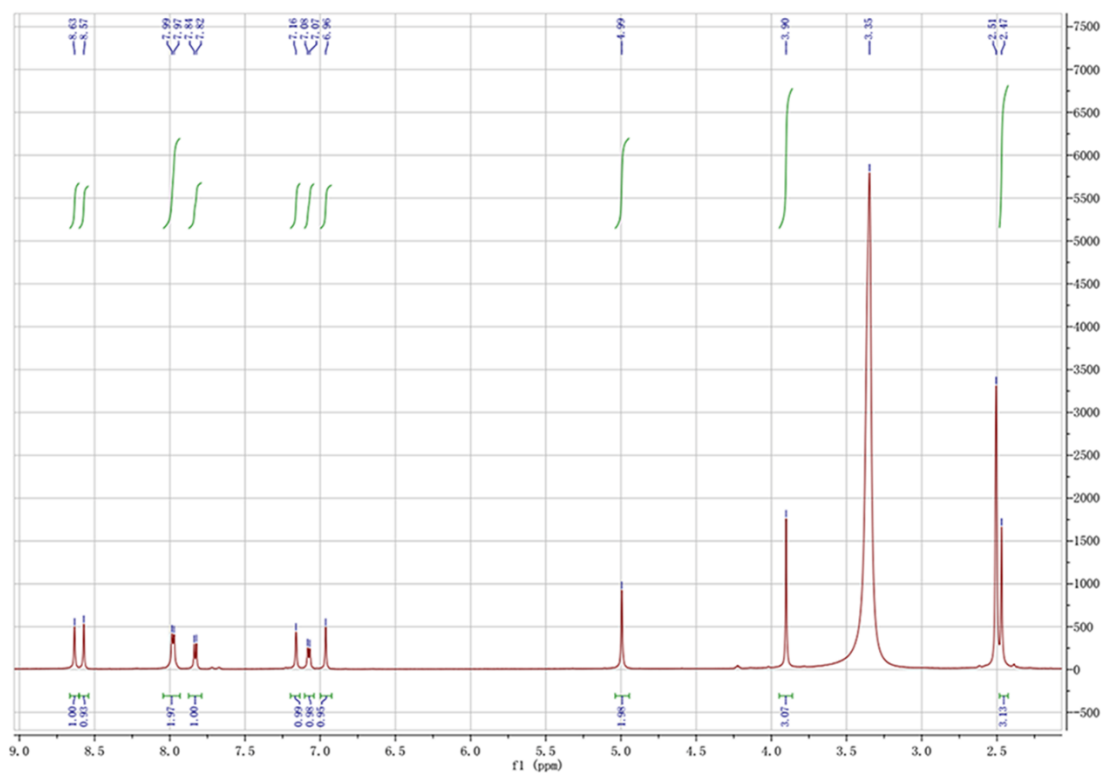

Figure S3.  $^1\text{H}$  NMR spectrum of DFHBI-CM (600 MHz,  $\text{DMSO-d}_6$ ).

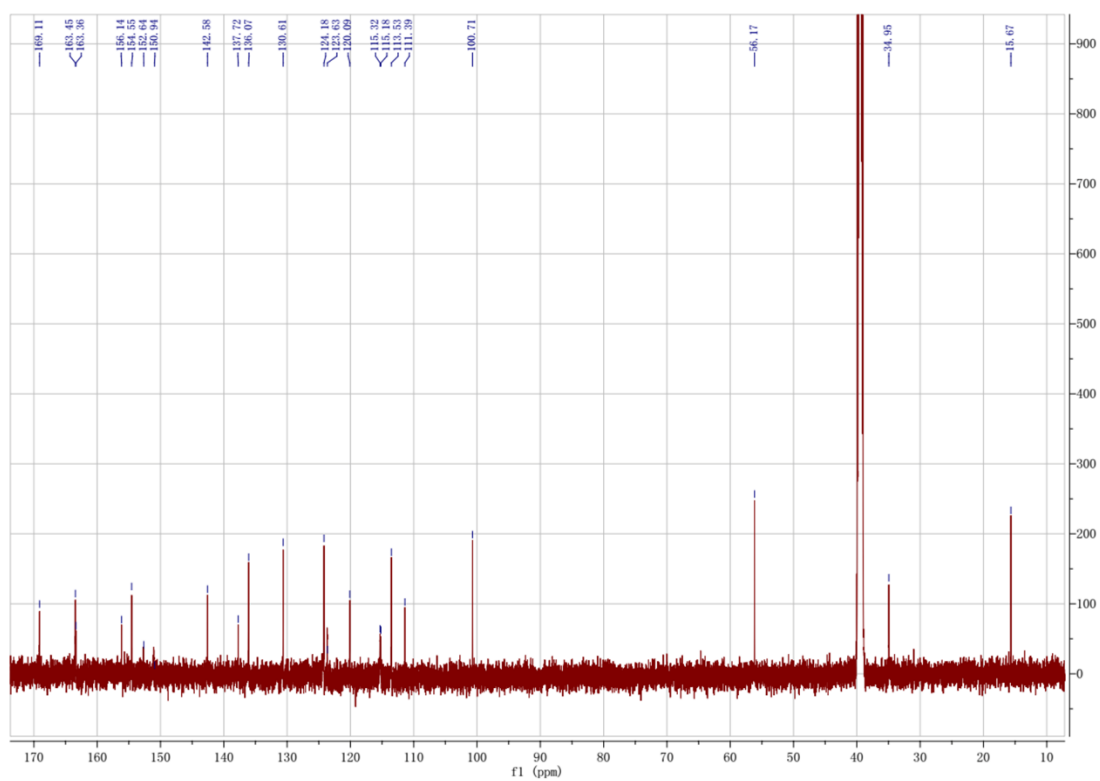

Figure S4.  $^{13}\text{C}$  NMR spectrum of DFHBI-CM (600 MHz,  $\text{DMSO-d}_6$ ).

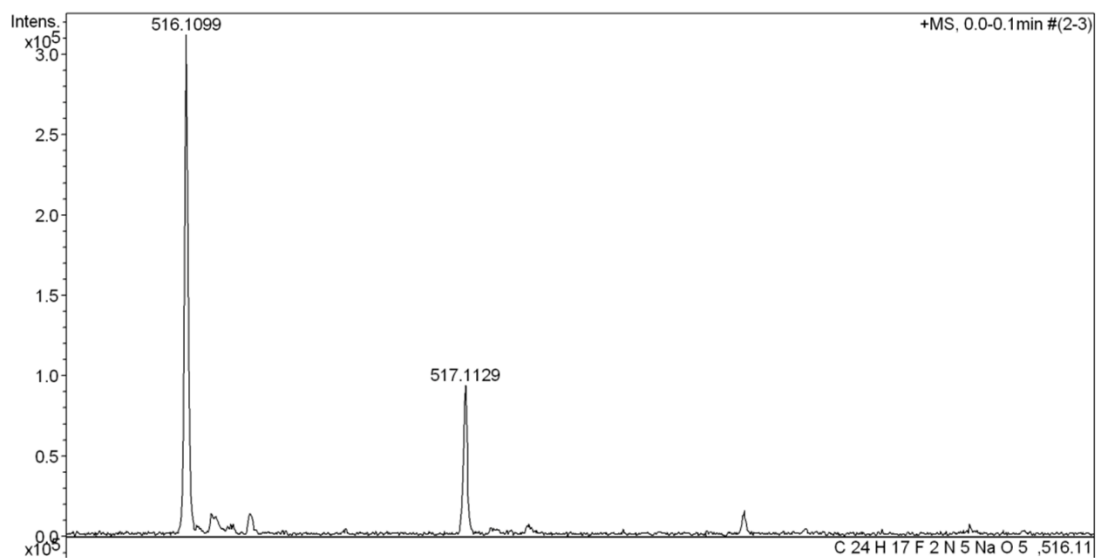

**Figure S5.** ESI-HRMS of DFHBI-CM.
